# Supplementary material for: Exonuclease-assisted enrichment and base resolution analysis of pseudouridine in single-stranded RNA
Source: Chem Sci. 2024 Oct 21;15(45):19022–8. doi: 10.1039/d4sc03576c (PMC11515940; doi:10.1039/d4sc03576c)
Supplement: SC-015-D4SC03576C-s001 [file SC-015-D4SC03576C-s001.xlsx]

## Sheet: Sheet1
gene_id	stop_pos	stop_base	Input R1	Input R2	Control R1	Control R2	15 min R1	15 min R2	30 min R1	30 min R2	60 min R1	60 min R2
60-RNA-Ψ	0		100	100	100	100	100	100	100	100	100	100
60-RNA-Ψ	1	C	24.97	26.1	25.16	24.26	78.5	78.54	78.15	78	78.55	79.49
60-RNA-Ψ	2	A	75.39	75.53	73.36	73.74	34.21	34.21	36.19	35.86	35.2	33.59
60-RNA-Ψ	3	G	0.74	0.76	1.18	1.1	19.26	19.59	19.1	18.97	19.69	19.85
60-RNA-Ψ	4	C	0.65	0.69	1.08	0.97	19.17	20.35	20.01	19.27	19.73	17.93
60-RNA-Ψ	5	A	0.26	0.26	0.32	0.31	3.37	3.7	3.54	3.71	3.71	3.48
60-RNA-Ψ	6	C	0.71	0.71	1.05	0.91	14.72	15.22	14.92	14.54	15.17	14.11
60-RNA-Ψ	7	A	0.46	0.46	0.7	0.62	8.79	9.33	8.99	8.83	9.04	8.62
60-RNA-Ψ	8	C	1.07	1.05	1.67	1.42	16	16.55	16.09	15.84	16.31	15.28
60-RNA-Ψ	9	G	0.6	0.59	0.93	0.81	10.21	10.4	10.1	10	10.48	10.23
60-RNA-Ψ	10	A	0.22	0.22	0.34	0.3	4.27	4.61	4.49	4.53	4.56	4.07
60-RNA-Ψ	11	A	0.19	0.19	0.24	0.21	3.73	3.91	3.94	3.96	3.95	3.65
60-RNA-Ψ	12	A	0.59	0.57	0.65	0.58	5.95	6.09	5.96	6.08	6.23	6.01
60-RNA-Ψ	13	A	0.53	0.53	0.68	0.61	6.42	6.67	6.42	6.45	6.6	6.52
60-RNA-Ψ	14	C	0.43	0.41	0.47	0.45	4.68	4.72	4.55	4.63	4.67	4.67
60-RNA-Ψ	15	C	0.79	0.79	0.88	0.81	7.15	7.46	7.15	7.18	7.16	6.74
60-RNA-Ψ	16	A	0.27	0.28	0.41	0.39	2.64	2.73	2.67	2.67	2.71	2.58
60-RNA-Ψ	17	A	1.08	1.1	1.27	1.21	8.61	8.87	8.54	8.57	8.64	8.44
60-RNA-Ψ	18	G	0.98	1.02	1.78	1.75	14.79	14.25	12.26	12.22	13.87	15.19
60-RNA-Ψ	19	A	0.13	0.14	0.44	0.42	15.13	15.35	14.81	14.86	15.33	14.58
60-RNA-Ψ	20	G	0.21	0.21	0.96	0.95	8.43	9.17	9.41	10	9.29	8.05
60-RNA-Ψ	21	T	1.16	1.18	25.37	25.39	54.02	54.27	52.78	53.05	52.66	52.07
60-RNA-Ψ	22	A	0.16	0.17	0.86	0.84	1.97	2.01	2	2.03	2.12	2.11
60-RNA-Ψ	23	C	0.25	0.23	0.57	0.55	1.42	1.47	1.52	1.59	1.62	1.57
60-RNA-Ψ	24	G	0.27	0.25	0.7	0.68	1.42	1.45	1.45	1.53	1.58	1.61
60-RNA-Ψ	25	C	0.26	0.24	0.62	0.6	1.41	1.43	1.35	1.4	1.45	1.43
60-RNA-Ψ	26	C	0.39	0.35	0.75	0.72	1.82	1.89	1.84	1.92	1.9	1.82
60-RNA-Ψ	27	G	0.29	0.26	0.58	0.55	1	1.03	1.02	1.08	1.06	1.03
60-RNA-Ψ	28	A	0.35	0.32	0.72	0.68	1.77	1.75	1.61	1.75	1.83	1.79
60-RNA-Ψ	29	A	0.13	0.12	0.31	0.29	0.8	0.79	0.76	0.82	0.83	0.8
60-RNA-Ψ	30	A	0.32	0.29	0.61	0.56	1.8	1.83	1.81	1.89	1.89	1.72
60-RNA-Ψ	31	G	0.25	0.24	0.59	0.54	1.28	1.27	1.29	1.35	1.31	1.21
60-RNA-Ψ	32	A	0.45	0.41	0.81	0.74	2.42	2.4	2.37	2.48	2.5	2.34
60-RNA-Ψ	33	G	0.19	0.17	0.4	0.35	1.01	1.02	1	1.08	1.05	0.94
60-RNA-Ψ	34	A	0.05	0.05	0.11	0.1	0.32	0.32	0.3	0.33	0.34	0.34
60-RNA-Ψ	35	C	0.14	0.13	0.23	0.19	0.64	0.64	0.62	0.68	0.68	0.62
60-RNA-Ψ	36	A	0.24	0.2	0.45	0.39	1.54	1.53	1.44	1.57	1.56	1.48
60-RNA-Ψ	37	C	0.11	0.1	0.2	0.17	0.84	0.84	0.84	0.91	0.87	0.73
60-RNA-Ψ	38	G	0.1	0.09	0.18	0.15	0.45	0.45	0.44	0.48	0.45	0.42
60-RNA-Ψ	39	C	0.15	0.13	0.26	0.22	0.85	0.82	0.78	0.84	0.88	0.77
60-RNA-Ψ	40	A	0.39	0.41	0.78	0.68	2.86	2.81	2.55	2.7	2.84	2.59
60-RNA-Ψ	41	C	0	0	0	0	0	0	0	0	0	0
60-RNA-Ψ	42	G	0	0	0	0	0	0	0	0	0	0
60-RNA-Ψ	43	A	0	0	0	0	0	0	0	0	0	0
60-RNA-Ψ	44	A	0	0	0	0	0	0	0	0	0	0
60-RNA-Ψ	45	C	0	0	0	0	0	0	0	0	0	0
60-RNA-Ψ	46	G	0	0	0	0	0	0	0	0	0	0
60-RNA-Ψ	47	A	0	0	0	0	0	0	0	0	0	0
60-RNA-Ψ	48	G	0	0	0	0	0	0	0	0	0	0
60-RNA-Ψ	49	A	0	0	0	0	0	0	0	0	0	0
60-RNA-Ψ	50	C	0	0	0	0	0	0	0	0	0	0
60-RNA-Ψ	51	A	0	0	0	0	0	0	0	0	0	0
60-RNA-Ψ	52	G	0	0	0	0	0	0	0	0	0	0
60-RNA-Ψ	53	A	0	0	0	0	0	0	0	0	0	0
60-RNA-Ψ	54	A	0	0	0	0	0	0	0	0	0	0
60-RNA-Ψ	55	C	0	0	0	0	0	0	0	0	0	0
60-RNA-Ψ	56	A	0	0	0	0	0	0	0	0	0	0
60-RNA-Ψ	57	G	0	0	0	0	0	0	0	0	0	0
60-RNA-Ψ	58	G	0	0	0	0	0	0	0	0	0	0
60-RNA-Ψ	59	A	0	0	0	0	0	0	0	0	0	0
