# Supplementary material for: Exonuclease-assisted enrichment and base resolution analysis of pseudouridine in single-stranded RNA
Source: Chem Sci. 2024 Oct 21;15(45):19022–8. doi: 10.1039/d4sc03576c (PMC11515940; doi:10.1039/d4sc03576c)
Supplement: SC-015-D4SC03576C-s002 [file SC-015-D4SC03576C-s002.xlsx]

## Sheet: Sheet1
gene_id	stop_pos	stop_base	stop_rate	stop_rate	stop_rate	stop_rate	stop_rate	stop_rate	stop_rate	stop_rate		stop_rate	stop_rate	stop_rate	stop_rate
60-RNA-Ψ	0		G1 R1	G1 R1	G2 R1	G2 R2	G3 R1	G3 R2	G4 R1	G4R2	Average	G1	G2	G3	G4
60-RNA-Ψ	1 (5')	C	27.7	28.51	26.97	27.56	29.93	29.71	33.01	32.64		28.105	27.265	29.82	32.825
60-RNA-Ψ	2	A	76.33	76.43	74.75	75.08	73.29	73.22	74.02	74.04		76.38	74.915	73.255	74.03
60-RNA-Ψ	3	G	0.85	0.83	1.16	1.12	1.85	1.87	2.49	2.48		0.84	1.14	1.86	2.485
60-RNA-Ψ	4	C	0.74	0.75	1.06	1.04	1.61	1.65	2.53	2.54		0.745	1.05	1.63	2.535
60-RNA-Ψ	5	A	0.29	0.3	0.39	0.37	0.42	0.43	0.52	0.53		0.295	0.38	0.425	0.525
60-RNA-Ψ	6	C	0.79	0.79	1.41	1.37	1.57	1.61	2.91	2.95		0.79	1.39	1.59	2.93
60-RNA-Ψ	7	A	0.53	0.53	0.9	0.86	0.94	0.96	1.87	1.85		0.53	0.88	0.95	1.86
60-RNA-Ψ	8	C	1.25	1.26	2.06	2.01	2.52	2.57	4.8	4.85		1.255	2.035	2.545	4.825
60-RNA-Ψ	9	G	0.69	0.69	0.95	0.94	1.32	1.35	2.27	2.32		0.69	0.945	1.335	2.295
60-RNA-Ψ	10	A	0.24	0.24	0.29	0.28	0.47	0.48	0.72	0.73		0.24	0.285	0.475	0.725
60-RNA-Ψ	11	A	0.21	0.21	0.24	0.23	0.28	0.29	0.36	0.36		0.21	0.235	0.285	0.36
60-RNA-Ψ	12	A	0.73	0.74	0.51	0.51	0.82	0.83	1.17	1.17		0.735	0.51	0.825	1.17
60-RNA-Ψ	13	A	0.67	0.69	0.55	0.55	0.8	0.81	0.92	0.92		0.68	0.55	0.805	0.92
60-RNA-Ψ	14	C	0.53	0.55	0.43	0.4	0.59	0.59	0.51	0.5		0.54	0.415	0.59	0.505
60-RNA-Ψ	15	C	1.06	1.11	0.82	0.8	1.08	1.08	0.92	0.91		1.085	0.81	1.08	0.915
60-RNA-Ψ	16	A	0.38	0.39	0.17	0.17	0.5	0.51	0.24	0.24		0.385	0.17	0.505	0.24
60-RNA-Ψ	17	A	1.51	1.61	0.44	0.37	1.52	1.54	0.68	0.62		1.56	0.405	1.53	0.65
60-RNA-Ψ	18	G	1.37	1.46	0.72	0.69	2	2.06	1.08	1.03		1.415	0.705	2.03	1.055
60-RNA-Ψ	19	A	0.17	0.19	0.1	0.1	0.6	0.62	0.13	0.13		0.18	0.1	0.61	0.13
60-RNA-Ψ	20	G	0.29	0.3	0.17	0.19	1.39	1.45	0.19	0.18		0.295	0.18	1.42	0.185
60-RNA-Ψ	21	T	1.8	1.9	0.73	0.74	36.7	37.21	1.09	1.03		1.85	0.735	36.955	1.06
60-RNA-Ψ	22	A	0.24	0.26	0.31	0.31	1.34	1.37	0.51	0.41		0.25	0.31	1.355	0.46
60-RNA-Ψ	23	C	0.35	0.33	0.95	0.97	0.62	0.64	1.46	0.97		0.34	0.96	0.63	1.215
60-RNA-Ψ	24	G	0.44	0.44	5.84	5.83	0.83	0.84	8.73	5.08		0.44	5.835	0.835	6.905
60-RNA-Ψ	25	C	0.4	0.41	22.26	21.37	1	1.01	11.73	14.17		0.405	21.815	1.005	12.95
60-RNA-Ψ	26	C	0.61	0.58	8.85	8.55	1	1.03	5.12	5.97		0.595	8.7	1.015	5.545
60-RNA-Ψ	27	G	0.41	0.4	2.24	2.24	0.61	0.62	1.59	1.79		0.405	2.24	0.615	1.69
60-RNA-Ψ	28	A	0.54	0.52	1.06	1.07	0.91	0.93	1.23	1.24		0.53	1.065	0.92	1.235
60-RNA-Ψ	29	A	0.19	0.2	0.34	0.34	0.43	0.44	0.51	0.52		0.195	0.34	0.435	0.515
60-RNA-Ψ	30	A	0.54	0.51	0.55	0.56	0.88	0.91	0.93	0.93		0.525	0.555	0.895	0.93
60-RNA-Ψ	31	G	0.43	0.43	0.39	0.4	0.65	0.66	0.64	0.64		0.43	0.395	0.655	0.64
60-RNA-Ψ	32	A	0.83	0.79	0.59	0.6	1.34	1.36	1.44	1.43		0.81	0.595	1.35	1.435
60-RNA-Ψ	33	G	0.36	0.36	0.28	0.29	0.51	0.52	0.53	0.52		0.36	0.285	0.515	0.525
60-RNA-Ψ	34	A	0.1	0.1	0.08	0.09	0.23	0.23	0.27	0.27		0.1	0.085	0.23	0.27
60-RNA-Ψ	35	C	0.24	0.26	0.17	0.17	0.34	0.35	0.31	0.31		0.25	0.17	0.345	0.31
60-RNA-Ψ	36	A	0.53	0.49	0.42	0.43	1.03	1.06	1.13	1.11		0.51	0.425	1.045	1.12
60-RNA-Ψ	37	C	0.22	0.21	0.19	0.2	0.39	0.39	0.4	0.4		0.215	0.195	0.39	0.4
60-RNA-Ψ	38	G	0.24	0.23	0.19	0.19	0.3	0.3	0.34	0.34		0.235	0.19	0.3	0.34
60-RNA-Ψ	39	C	0.35	0.32	0.3	0.3	0.62	0.62	0.68	0.63		0.335	0.3	0.62	0.655
60-RNA-Ψ	40	A	0.73	0.7	0.66	0.64	1.65	1.68	2.12	1.86		0.715	0.65	1.665	1.99
60-RNA-Ψ	41	C	0	0	0	0	0	0	0	0
60-RNA-Ψ	42	G	0	0	0	0	0	0	0	0
60-RNA-Ψ	43	A	0	0	0	0	0	0	0	0
60-RNA-Ψ	44	A	0	0	0	0	0	0	0	0
60-RNA-Ψ	45	C	0	0	0	0	0	0	0	0
60-RNA-Ψ	46	G	0	0	0	0	0	0	0	0
60-RNA-Ψ	47	A	0	0	0	0	0	0	0	0
60-RNA-Ψ	48	G	0	0	0	0	0	0	0	0
60-RNA-Ψ	49	A	0	0	0	0	0	0	0	0
60-RNA-Ψ	50	C	0	0	0	0	0	0	0	0
60-RNA-Ψ	51	A	0	0	0	0	0	0	0	0
60-RNA-Ψ	52	G	0	0	0	0	0	0	0	0
60-RNA-Ψ	53	A	0	0	0	0	0	0	0	0
60-RNA-Ψ	54	A	0	0	0	0	0	0	0	0
60-RNA-Ψ	55	C	0	0	0	0	0	0	0	0
60-RNA-Ψ	56	A	0	0	0	0	0	0	0	0
60-RNA-Ψ	57	G	0	0	0	0	0	0	0	0
60-RNA-Ψ	58	G	0	0	0	0	0	0	0	0
60-RNA-Ψ	59	A	0	0	0	0	0	0	0	0
