# Supplementary material for: Exonuclease-assisted enrichment and base resolution analysis of pseudouridine in single-stranded RNA
Source: Chem Sci. 2024 Oct 21;15(45):19022–8. doi: 10.1039/d4sc03576c (PMC11515940; doi:10.1039/d4sc03576c)
Supplement: SC-015-D4SC03576C-s003 [file SC-015-D4SC03576C-s003.xlsx]

## Sheet: Sheet1
gene_id	stop_pos	stop_base	stop_rate	stop_rate	stop_rate	stop_rate	stop_rate	stop_rate
			Mix1 R1	Mix1 R2	Mix2 R1	Mix2 R2	Mix3 R1	Mix3 R2
32-RNA-Ψ	1 (5')	G	8.29	8.37	9.86	9.81	52.01	52.25
32-RNA-Ψ	2	C	5.54	5.64	9.16	9.14	45.54	45.72
32-RNA-Ψ	3	A	2.32	2.41	2.88	2.88	11.89	11.96
32-RNA-Ψ	4	C	3.71	3.86	5.98	5.97	22.18	22.15
32-RNA-Ψ	5	T	6.63	6.69	11.81	11.8	36.51	36.7
32-RNA-Ψ	6	A	1.3	1.33	3.68	3.66	21.05	21.09
32-RNA-Ψ	7	C	1.07	1.12	4.73	4.73	33.5	33.4
32-RNA-Ψ	8	T	3.5	3.46	57.31	57.26	77.63	77.7
32-RNA-Ψ	9	A	2.17	2.15	4.31	4.29	5.97	5.95
32-RNA-Ψ	10	T	2.22	2.2	3.34	3.31	4.9	4.86
32-RNA-Ψ	11	C	1	1	1.62	1.61	2.86	2.87
32-RNA-Ψ	12	T	7.36	7.27	6.87	6.9	9.66	9.62
32-RNA-Ψ	13	A	0	0	0	0	0	0
32-RNA-Ψ	14	T	0	0	0	0	0	0
32-RNA-Ψ	15	G	0	0	0	0	0	0
32-RNA-Ψ	16	A	0	0	0	0	0	0
32-RNA-Ψ	17	A	0	0	0	0	0	0
32-RNA-Ψ	18	T	0	0	0	0	0	0
32-RNA-Ψ	19	C	0	0	0	0	0	0
32-RNA-Ψ	20	T	0	0	0	0	0	0
32-RNA-Ψ	21	C	0	0	0	0	0	0
32-RNA-Ψ	22	G	0	0	0	0	0	0
32-RNA-Ψ	23	A	0	0	0	0	0	0
32-RNA-Ψ	24	A	0	0	0	0	0	0
32-RNA-Ψ	25	T	0	0	0	0	0	0
32-RNA-Ψ	26	G	0	0	0	0	0	0
32-RNA-Ψ	27	T	0	0	0	0	0	0
32-RNA-Ψ	28	G	0	0	0	0	0	0
32-RNA-Ψ	29	A	0	0	0	0	0	0
32-RNA-Ψ	30	A	0	0	0	0	0	0
32-RNA-Ψ	31	G	0	0	0	0	0	0
gene_id	stop_pos	stop_base	stop_rate	stop_rate	stop_rate	stop_rate	stop_rate	stop_rate
			Mix1 R1	Mix1 R2	Mix2 R1	Mix2 R2	Mix3 R1	Mix3 R2
60-RNA-Ψ	1	C	27.29	27.3	32.7	32.71	82.95	83.07
60-RNA-Ψ	2	A	74.58	74.6	73.94	73.91	32.01	31.85
60-RNA-Ψ	3	G	0.97	0.99	2.18	2.19	30.77	30.75
60-RNA-Ψ	4	C	0.87	0.9	2.35	2.34	27.92	27.72
60-RNA-Ψ	5	A	0.38	0.39	0.56	0.56	4.57	4.55
60-RNA-Ψ	6	C	0.97	1	2.5	2.52	22.37	22.33
60-RNA-Ψ	7	A	0.68	0.7	1.7	1.73	13.43	13.39
60-RNA-Ψ	8	C	1.4	1.45	4.34	4.38	26.36	26.33
60-RNA-Ψ	9	G	0.74	0.78	2.18	2.22	16.04	16.06
60-RNA-Ψ	10	A	0.3	0.32	0.73	0.74	5.73	5.71
60-RNA-Ψ	11	A	0.23	0.24	0.42	0.42	3.87	3.85
60-RNA-Ψ	12	A	0.55	0.56	1.32	1.33	9.3	9.37
60-RNA-Ψ	13	A	0.55	0.57	1.07	1.07	8.81	8.76
60-RNA-Ψ	14	C	0.45	0.48	0.68	0.68	4.49	4.54
60-RNA-Ψ	15	C	0.63	0.66	1.01	1.02	6.53	6.52
60-RNA-Ψ	16	A	0.17	0.18	0.28	0.29	2.13	2.11
60-RNA-Ψ	17	A	0.49	0.5	0.85	0.86	6.85	6.86
60-RNA-Ψ	18	G	0.57	0.58	1.03	1.03	7.87	7.91
60-RNA-Ψ	19	A	0.12	0.13	0.18	0.19	1.13	1.11
60-RNA-Ψ	20	G	0.24	0.25	0.42	0.42	1.65	1.67
60-RNA-Ψ	21	T	0.75	0.77	1.55	1.55	7.09	7.16
60-RNA-Ψ	22	A	0.9	0.91	1.67	1.68	1.81	1.8
60-RNA-Ψ	23	C	2.83	2.87	5.78	5.75	2.59	2.62
60-RNA-Ψ	24	G	4.89	4.97	9.27	9.22	3.2	3.26
60-RNA-Ψ	25	C	4.21	4.24	5.92	5.9	3	3.01
60-RNA-Ψ	26	C	2	2.05	2.86	2.84	3.36	3.4
60-RNA-Ψ	27	G	0.76	0.79	1.23	1.21	1.55	1.56
60-RNA-Ψ	28	A	0.6	0.61	1.27	1.25	3.56	3.58
60-RNA-Ψ	29	A	0.16	0.16	0.49	0.48	1.84	1.83
60-RNA-Ψ	30	A	0.3	0.3	0.88	0.85	4.41	4.41
60-RNA-Ψ	31	G	0.2	0.2	0.63	0.6	2.7	2.7
60-RNA-Ψ	32	A	0.29	0.3	1.37	1.32	6.86	6.85
60-RNA-Ψ	33	G	0.14	0.14	0.52	0.51	2.15	2.17
60-RNA-Ψ	34	A	0.04	0.04	0.23	0.22	1.04	1.05
60-RNA-Ψ	35	C	0.08	0.08	0.27	0.26	1.58	1.58
60-RNA-Ψ	36	A	0.18	0.18	0.93	0.89	4.44	4.48
60-RNA-Ψ	37	C	0.1	0.1	0.34	0.32	1.98	1.99
60-RNA-Ψ	38	G	0.09	0.1	0.27	0.25	1.13	1.14
60-RNA-Ψ	39	C	0.25	0.26	0.54	0.52	2.39	2.42
60-RNA-Ψ	40	A	1.02	1.06	1.87	1.77	8.02	8.17
60-RNA-Ψ	41	C	0	0	0	0	0	0
60-RNA-Ψ	42	G	0	0	0	0	0	0
60-RNA-Ψ	43	A	0	0	0	0	0	0
60-RNA-Ψ	44	A	0	0	0	0	0	0
60-RNA-Ψ	45	C	0	0	0	0	0	0
60-RNA-Ψ	46	G	0	0	0	0	0	0
60-RNA-Ψ	47	A	0	0	0	0	0	0
60-RNA-Ψ	48	G	0	0	0	0	0	0
60-RNA-Ψ	49	A	0	0	0	0	0	0
60-RNA-Ψ	50	C	0	0	0	0	0	0
60-RNA-Ψ	51	A	0	0	0	0	0	0
60-RNA-Ψ	52	G	0	0	0	0	0	0
60-RNA-Ψ	53	A	0	0	0	0	0	0
60-RNA-Ψ	54	A	0	0	0	0	0	0
60-RNA-Ψ	55	C	0	0	0	0	0	0
60-RNA-Ψ	56	A	0	0	0	0	0	0
60-RNA-Ψ	57	G	0	0	0	0	0	0
60-RNA-Ψ	58	G	0	0	0	0	0	0
60-RNA-Ψ	59	A	0	0	0	0	0	0
